# Supplementary material
Source: publisher figshare collection journal article supplement (https://gsajournals.figshare.com/ndownloader/files/24560897)
Supplement: Supplementary file 1 [file 24560897]

| Species / version | Scaffold | Position |
| --- | --- | --- |
| *optix* | | |
| *H. melpomene* v2 | Hmel218003 | 680000-830000 |
| *H. erato* v1 | Herato1801 | 1208139-1447939 |
| *Bicyclus anynana v1.2* | BANY00063 | 271985-692385 |
| *Bombyx mori* ASM1562v1 | NW_004582019.1 | 1225000-1756500 |
| *Manduca sexta* Msex_1.0 | JH668350 | 275000-445000 |
| *Papilio polytes* Ppol_1.0 | Scaffold3069 | 1160000-1250000 |
| *WntA* | | |
| *H. melpomene* v2 | Hmel210001 | 1730000-1930000 |
| *H. erato* v1 | Herato1001 | 4550000-4816000 |
| *Bicyclus anynana v1.2* | BANY000083 | 329000-962000 |
| *Bombyx mori* ASM1562v1 | NW_0045841696 | 580000-854000 |
| *Danaus plexippus* v3 | DPSCF300181 | 110000-210000 |
| *Manduca sexta* Msex_1.0 | JH668507 | 1-190000 |
| *Papilio polytes* Ppol_1.0 | Scaffold3602 | 633000-880000 |
| *Cortex* | | |
| *H. melpomene* v2 | Hmel215003 | 1100000-1450000 |
| *H. erato* v1 | Herato1505 | 192800-235100 |
| *Bicyclus anynana* v1.2 | BANY000037 | 506000-650000 |
| *Bombyx mori* ASM1562v1 | NW_004581682 | 2752000-2248000 |
| *Danaus plexippus* v3 | DPSCF300026 | 618000-844000 |
| *Manduca sexta* Msex_1.0 | JH668816 | Whole scaffold |
| *Papilio polytes* Ppol_1.0 | Scaffold1444 | 5083000-6085000 |
